# Supplementary material for: Elucidating π–π interaction-induced extension effect in sandwich phthalocyaninato compounds
Source: Royal Society of Chemistry journal article supplement (doi:10.1039/c9ra07847a), 2020-01-01
Supplement: c9ra07847a1.pdf [file c9ra07847a1.pdf]

## Electronic Supplementary Information

### Elucidating $\pi$ - $\pi$ Interaction-Induced Extension Effect in Sandwich Phthalocyaninato Compounds

Xin Chen,<sup>a†</sup> Dongdong Qi,<sup>a†</sup> Chao Liu,<sup>a</sup> Hailong Wang,<sup>a\*</sup> Zheng Xie,<sup>b</sup> Tse-Wei Chen,<sup>c</sup> Shen-Ming  
Chen,<sup>c\*</sup> Tien-Wen Tseng<sup>c\*</sup> and Jianzhuang Jiang<sup>a\*</sup>

## Caption of Content

- 1. Fig S1.**  $^1\text{H}$  NMR and  $^1\text{H}$ - $^1\text{H}$  COSY spectra of **3** in  $\text{CDCl}_3$ .
- 2. Fig S2.**  $^1\text{H}$  NMR and  $^1\text{H}$ - $^1\text{H}$  COSY spectra of **4** in  $\text{CDCl}_3$ .
- 3. Fig S3.** Cyclic voltammetry of quintuple-decker complexes  $\{[(\text{Pc}^*)\text{Sm}][(\text{Pc}^*)\text{Cd}_n(\text{Pc}^*)_n][\text{Sm}(\text{Pc}^*)]\}$  ( $n = 0-3$ ) (**3-6**) in  $\text{CH}_2\text{Cl}_2$  containing 0.1 M  $[\text{NBu}_4][\text{ClO}_4]$  at scan rate of 40 mV/s.
- 4. Fig S4.** The frontier molecular orbital energies for  $\{[(\text{Pc})\text{La}][(\text{Pc})\text{Cd}_n(\text{Pc})_n][\text{La}(\text{Pc})]\}$  ( $n = 0-2$ ) (**a-c**).
- 5. Fig S5.** The frontier molecular orbital map for  $(\text{Pc})\text{La}(\text{Pc})\text{La}(\text{Pc})$ .
- 6. Fig S6.** The frontier molecular orbital map for  $(\text{Pc})\text{La}(\text{Pc})\text{Cd}(\text{Pc})\text{La}(\text{Pc})$ .
- 7. Fig S7.** The frontier molecular orbital map for  $(\text{Pc})\text{La}(\text{Pc})\text{Cd}(\text{Pc})\text{Cd}(\text{Pc})\text{La}(\text{Pc})$ .
- 8. Table S1.** Half-wave redox potentials of the compounds **3-6** (V vs SCE) in  $\text{CH}_2\text{Cl}_2$  containing 0.1 M TBAP.

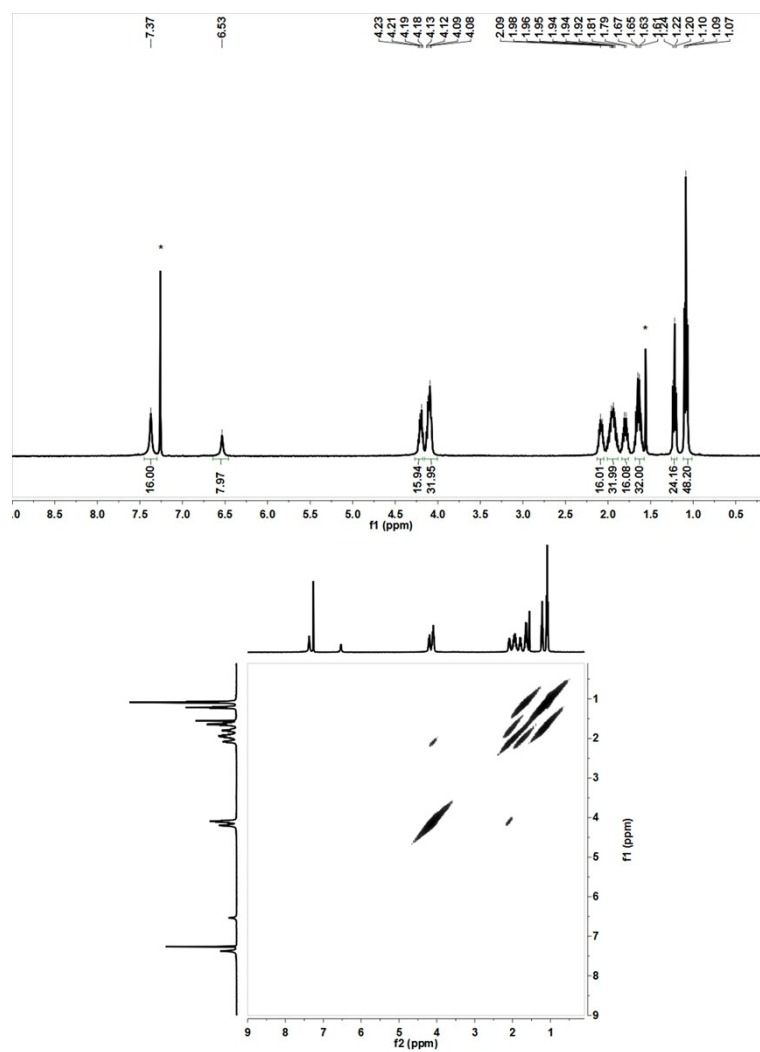

**Fig S1.** <sup>1</sup>H NMR and <sup>1</sup>H-<sup>1</sup>H COSY spectra of **3** in CDCl<sub>3</sub>

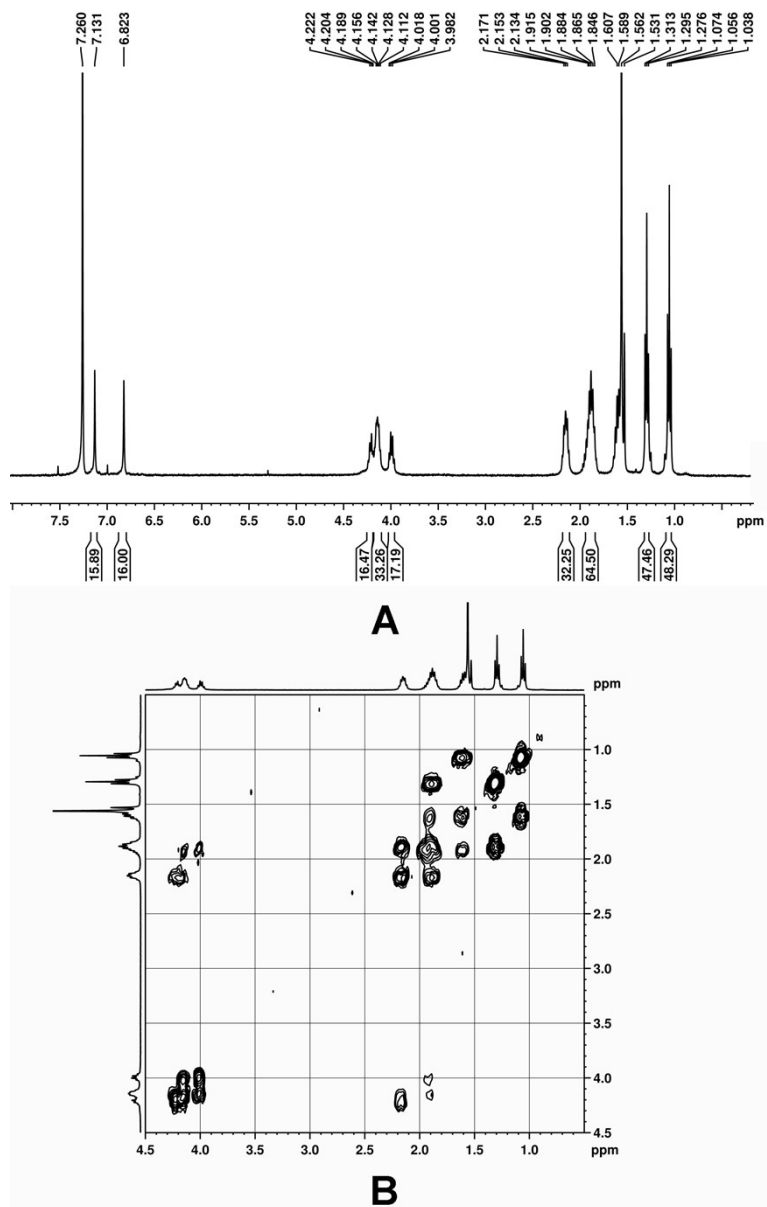

**Fig S2.**  $^1\text{H}$  NMR and  $^1\text{H}$ - $^1\text{H}$  COSY spectra of **4** in  $\text{CDCl}_3$ .

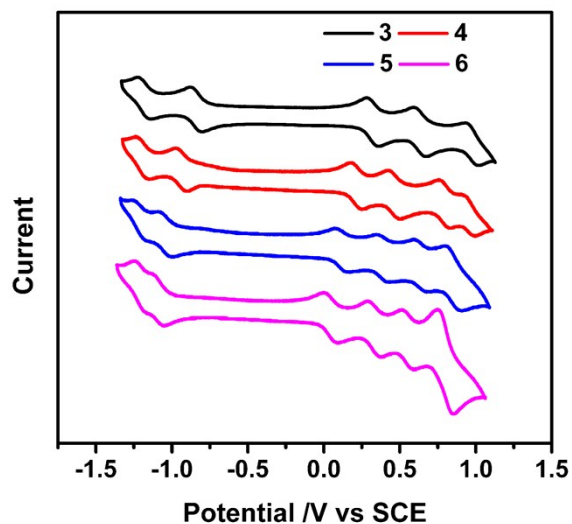

**Fig S3.** Cyclic voltammetry of quintuple-decker complexes  $\{[(\text{Pc}^*)\text{Sm}][(\text{Pc}^*)\text{Cd}_n(\text{Pc}^*)_n][\text{Sm}(\text{Pc}^*)]\}$  ( $n = 0-3$ ) (**3-6**) in  $\text{CH}_2\text{Cl}_2$  containing 0.1 M  $[\text{NBu}_4][\text{ClO}_4]$  at the scan rate of 40 mV/s.

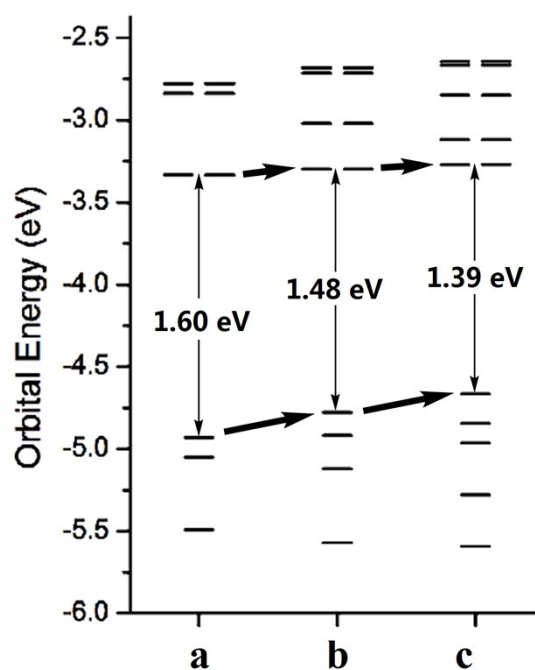

**Fig S4.** The frontier molecular orbital energies for  $\{[(\text{Pc})\text{La}][(\text{Pc})\text{Cd}_n(\text{Pc})_n][\text{La}(\text{Pc})]\}$  ( $n = 0-2$ ) (**a-c**).

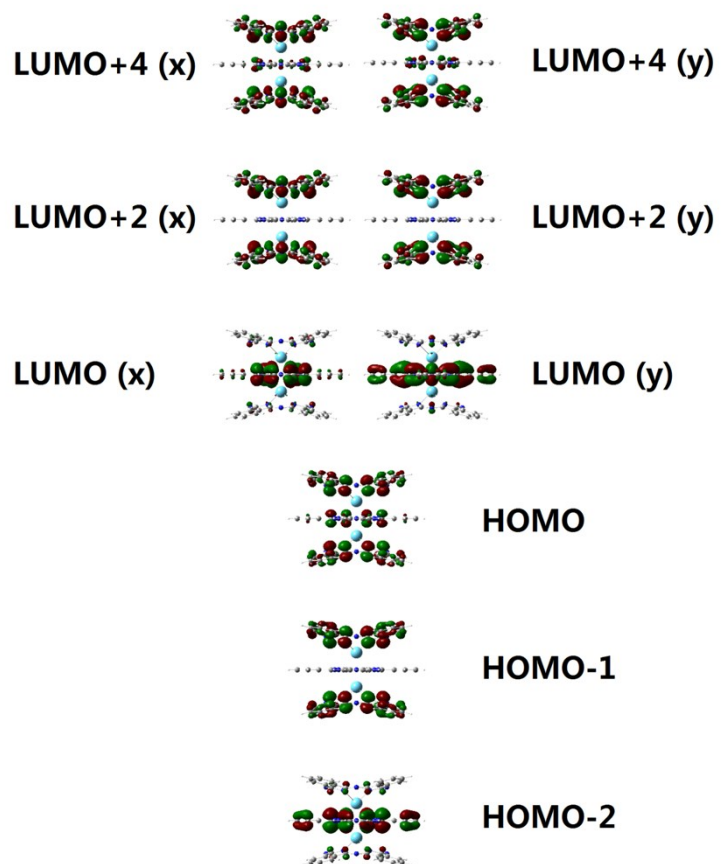

**Fig S5.** Frontier molecular orbital map for (Pc)La(Pc)La(Pc).

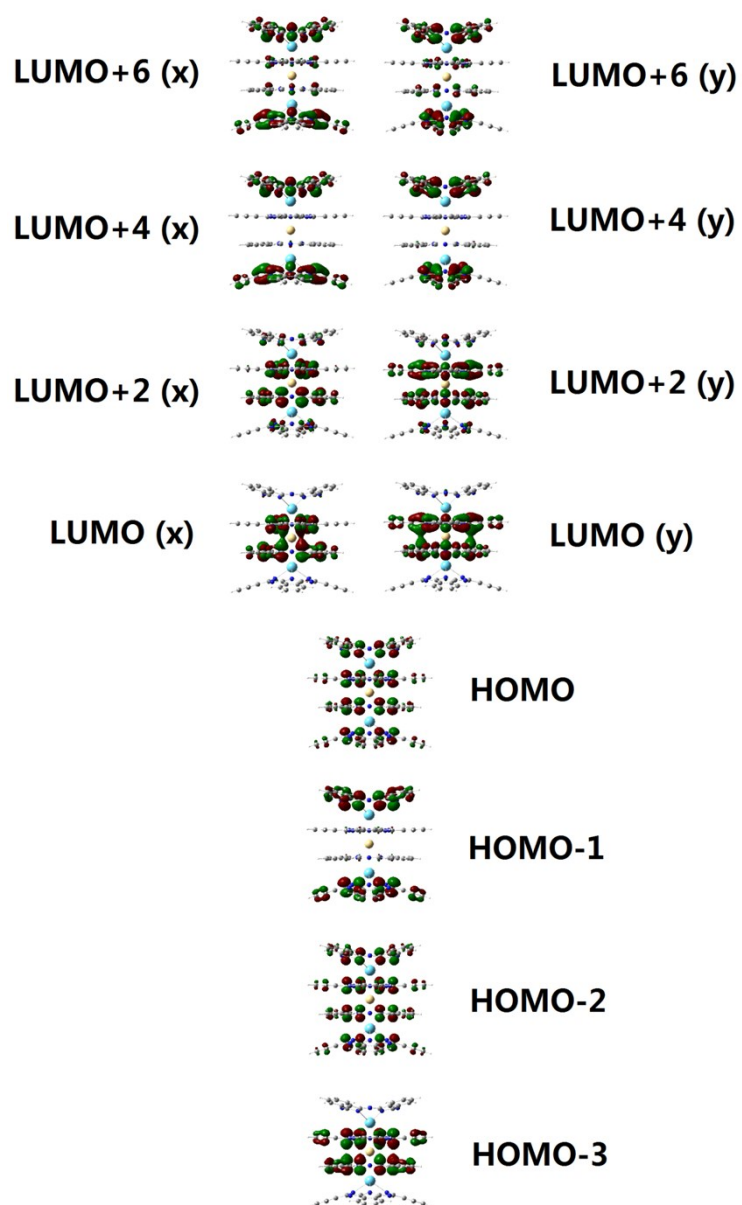

**Fig S6.** Frontier molecular orbital map for (Pc)La(Pc)Cd(Pc)La(Pc).

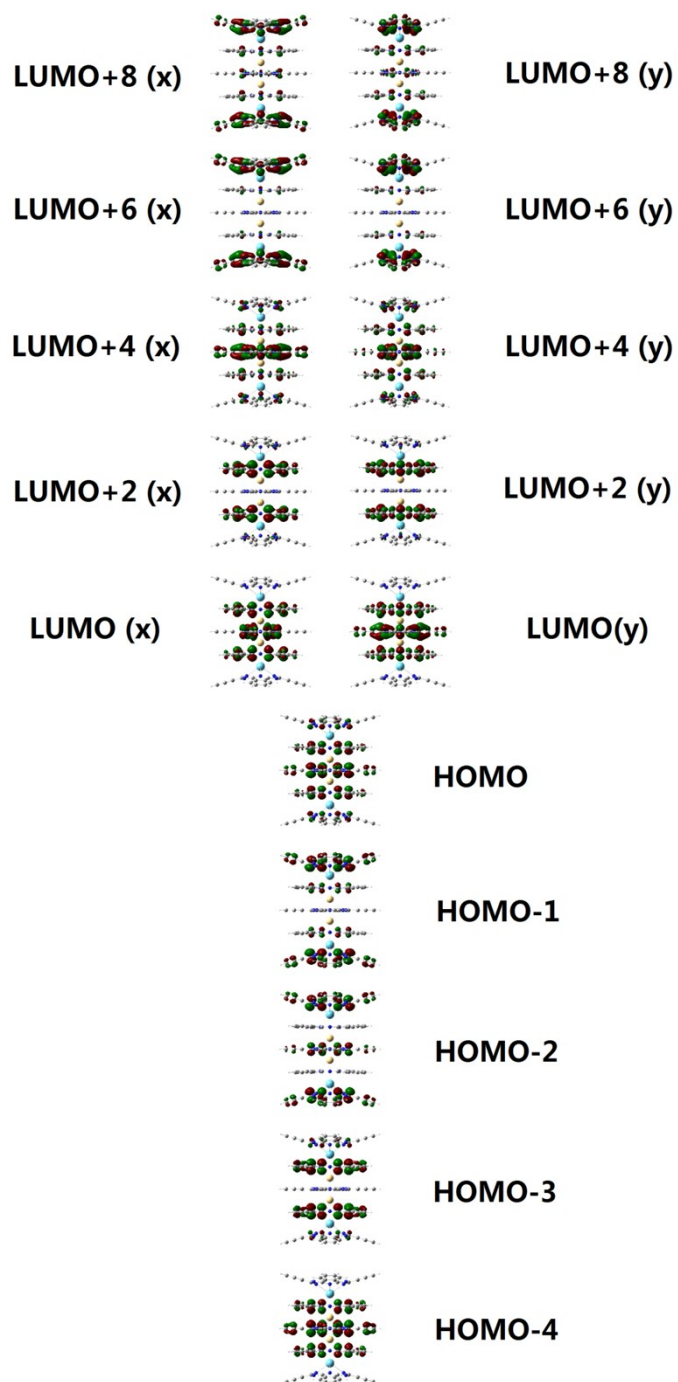

**Fig S7.** Frontier molecular orbital map for (Pc)La(Pc)Cd(Pc)Cd(Pc)La(Pc).



**Table S1.** Half-wave redox potentials of the compounds **3-6**.<sup>a</sup>

| Compound | Oxd <sub>4</sub> | Oxd <sub>3</sub> | Oxd <sub>2</sub> | Oxd <sub>1</sub> | Red <sub>1</sub> | Red <sub>2</sub> | ΔE <sup>o</sup> <sub>1/2</sub> |
|----------|------------------|------------------|------------------|------------------|------------------|------------------|--------------------------------|
| <b>3</b> | --               | 0.98             | 0.63             | 0.33             | -0.85            | -1.18            | 1.18                           |
| <b>4</b> | 0.94             | 0.79             | 0.47             | 0.22             | -0.95            | -1.20            | 1.17                           |
| <b>5</b> | 0.85             | 0.64             | 0.39             | 0.12             | -1.05            | -1.22            | 1.17                           |
| <b>6</b> | 0.81             | 0.55             | 0.34             | 0.06             | -1.09            | -1.22            | 1.15                           |

<sup>a</sup> Recorded with [Bu<sub>4</sub>N][ClO<sub>4</sub>] as electrolyte in CH<sub>2</sub>Cl<sub>2</sub> (0.1 mol dm<sup>-3</sup>) at ambient temperature. Potentials were obtained by cyclic voltammetry with a scan rate of 40 mV s<sup>-1</sup>, and are expressed as half-wave potentials ( $E_{1/2}$ ) in V relative to SCE unless otherwise stated.
